# Supplementary material
Source: PubMed Central journal article supplement (PMC2620822)
Supplement: supp_191_2_576__1.pdf [file supp_191_2_576__1.pdf]

A

```

*      20      *      40      *      60      *      80      *      100     *      120
vtaA1 : ATGAATAAAATATTTAGAGTTATTTGGAGTCATGCTCAACAGGCTTGGGTGGTTGTATCTGAGTTAGTAAAGTCTCATACCAAACATCCGCTTACACGGATAAAAGAGCTCAAGTATGCACCTC : 125
vtaA2 : .....A..... : 125
vtaA3 : .....T..... : 125
vtaA4 : .....G.....C..... : 125
vtaA5 : .....G.....C..... : 125
vtaA6 : .....A.....A.....G..... : 125
vtaA7 : .....T..... : 125
vtaA8 : .....T..... : 125
vtaA9 : .....G..... : 125
vtaA10 : ..... : 125
vtaA11 : .....T..... : 125
vtaA12 : .....T.....A.....A.....A..... : 125
vtaA13 : .....G.....C..... : 125
vtaA14 : .....A.....C..... : 121
vtaA15 : .....A.....A..... : 125
vtaA16 : .....C..... : 124
vtaA17 : .....T.....A.....GT..... : 122
vtaA18 : .....G..... : 125
vtaA19 : ----- : 9
vtaA20 : .....T.....A.....G..... : 125
vtaA21 : .....G.....T..... : 125
vtaA22 : .....T.....A.....G..... : 122
vtaA23 : .....G.....A.....G..... : 125
vtaA24 : .....G..... : 122
vtaA25 : .....A.....G..... : 125
vtaA26 : .....AGA.....T.....C..... : 125
vtaA27 : .....T.....G..... : 122
vtaA28 : .....G.....T.....G..... : 125
vtaA30 : .....T.....A.....GT..... : 125

```

pADH-F ATGAATAAAATATTTAGAGTTATTTGG >

```

*      140     *      160     *      180     *      200     *      220     *      240     *
vtaA1 : AGATTATTTTTAGATAAACAGCAAGATAAAATTTAAATTAAGTCTTTTAAGTCTAGTATTACTAGGTATATTTTTAGTTCA-----GTAGGTTT-----AGCTGCAT : 223
vtaA2 : .....C.....TA-----GCT.---... : 223
vtaA3 : .....C.....A-----GC.---... : 223
vtaA4 : .....C.....CG.C..... : 226
vtaA5 : .....A.....C.....GTAGCA.....G.ACAACTTCACACAGG.A.AC... : 244
vtaA6 : .C.....C.....CG.C.....AGCTACTCACTCAGG.A.AC... : 241
vtaA7 : .....A.....A.C.....GT---A.....G.AGATCGTCATAAAGG.A.C... : 241
vtaA8 : .....T.....C.....A-----GC.A---GGC : 223
vtaA9 : .....A.....C.....GTAGCA.....G.ACAACTTCACACAGG.A.A... : 244
vtaA10 : .....TAG.....A-----GCT.---... : 223
vtaA11 : .....G.....C.....GTA.C.....AAT-----TACTGATT.AT... : 235
vtaA12 : .C.....T.....T.A.....C.....A-----GC.A---GGC : 223
vtaA13 : .....C.....TCAGCT.CT.C.AACACAACAAATACCGC.AAAC... : 244
vtaA14 : .....A.....A.C.....GT---AT.....GTAAAA---CACACAGG.CAAC... : 234
vtaA15 : .C.....C.....CG.C.....AGCTACTCACTCAGG.A.AC... : 241
vtaA16 : .....C.....TCAGCT.CT.C.AACACAACAAATAACGC.CAAC... : 243
vtaA17 : .....A.....T.....A-----GC.C---A.. : 220
vtaA18 : .....C.....TCAGCT.CT.C.AACACAACAAATACCGC.CAAC..C : 244
vtaA19 : .C.....A.....A.....C.....A-----GC.---... : 106
vtaA20 : .....A-----GCT.AGC... : 226
vtaA21 : .....C.....TCAGCT.CT.C.AACGCAACAAATACCGC.A.AC... : 244
vtaA22 : .....A.....T.....C.....TA-----GCT.---T.. : 220
vtaA23 : .....A-----GCT.---... : 223
vtaA24 : .....C.....TCAGCT.CT.C.AACACAACAAATACCGC.CAA... : 241
vtaA25 : .C.....A.....T.....A-----GC.C---A.. : 223
vtaA26 : .....A.....C.....TA-----GCT.---T.. : 223
vtaA27 : .....C.....TA-----GCT.---... : 220
vtaA28 : .....A-----GCT.AGC... : 226
vtaA30 : .....GTAGGTTTCAGCA.C..C.G.TAGCACAAGTAACGA.AAAC... : 250

```

c5-F GATAAATTTAAATTAAGTγTTTTAAGTCTAG >

B

|        |   |                                                      |     |                                                                                        |   |     |   |    |   |     |   |     |   |     |         |
|--------|---|------------------------------------------------------|-----|----------------------------------------------------------------------------------------|---|-----|---|----|---|-----|---|-----|---|-----|---------|
|        | * | 20                                                   | *   | 40                                                                                     | * | 60  | * | 80 | * | 100 | * | 120 | * | 140 |         |
| vtaA1  | : | TTTAGGTAAAGATAAGCAAGGAAATCCAGTTGTAATATGAATGGTGCCAGAA | --- | TTACCAACGTTGGAGATGGTAGTGCTGAGGGCGATATTGTGAATGTGCGTCAGCTCAACAAAGTGGTTTCTTCTGTGAATACAGGA | : | 139 |   |    |   |     |   |     |   |     |         |
| vtaA2  | : | .....C.....                                          | --- | .....T.....                                                                            | : | 139 |   |    |   |     |   |     |   |     |         |
| vtaA3  | : | .....                                                | --- | .....T.....                                                                            | : | 139 |   |    |   |     |   |     |   |     |         |
| vtaA4  | : | .....C.....                                          | --- | .....T.....                                                                            | : | 139 |   |    |   |     |   |     |   |     |         |
| vtaA5  | : | .....                                                | --- | .....                                                                                  | : | 139 |   |    |   |     |   |     |   |     |         |
| vtaA6  | : | .....                                                | --- | .....T.....                                                                            | : | 139 |   |    |   |     |   |     |   |     |         |
| vtaA7  | : | .....                                                | --- | .....T.....                                                                            | : | 139 |   |    |   |     |   |     |   |     | GROUP 1 |
| vtaA8  | : | .....                                                | --- | .....T.....                                                                            | : | 139 |   |    |   |     |   |     |   |     |         |
| vtaA9  | : | .....C.....                                          | --- | .....T.....                                                                            | : | 139 |   |    |   |     |   |     |   |     |         |
| vtaA14 | : | .....C.....                                          | --- | .....T.....                                                                            | : | 139 |   |    |   |     |   |     |   |     |         |
| vtaA15 | : | .....                                                | --- | .....T.....                                                                            | : | 139 |   |    |   |     |   |     |   |     |         |
| vtaA16 | : | .....C.....                                          | --- | .....T.....                                                                            | : | 139 |   |    |   |     |   |     |   |     |         |
| YADAF1 | : | TTTAGGTAAAGATAAGCAAGGAAATCC>                         |     |                                                                                        |   |     |   |    |   |     |   |     |   |     |         |

|        |   |                                                                                                                                              |   |     |         |
|--------|---|----------------------------------------------------------------------------------------------------------------------------------------------|---|-----|---------|
| vtaA10 | : | CG.G.....T.TAG---.CA.T...GGCAAAA.GG.A.CTCGCC..ATTCA..ACG..G.ACCT.G.TT.ATCTC.GAGCAAAGTAC...GCGA.T...GTA.C...T.GT.T.GCT.AA.A.-C..A.CAC.AGGT.C. | : | 138 |         |
| vtaA11 | : | CG.G.....T.TAG---.CA.TG..GGCAAAA.GG.A.CTCG.C..ATTCA..ACG..G.ACCT.G.TT.ATCTC.GAGCAAAGTAC...GCGA.T...GTA.C...T.GT.T.GCT.AA.A.-C..A.CAC.AGGT.C. | : | 138 |         |
| vtaA17 | : | CG.G.....T.TAG---.CA.T...GGCAAAA.GG.A.CTCG.C..ATTCA..ACG..G.ACCT.G.TT.ATCTC.GAGCAAAGTAC...GCGA.T...GTA.C...T.GT.T.GCT.AA.A.-C..A.CAC.AGGT.C. | : | 138 |         |
| vtaA18 | : | CG.G.....T.TAG---.CA.TG..GGCAAAA.GG.A.CTCG.C..ATTCA..ACG..G.ACCT.G.TT.ATCTC.GAGCAAAGTAC...GCGA.T...GTA.C...T.GT.T.GCT.AA.A.-C..A.CAC.AGGT.C. | : | 138 |         |
| vtaA19 | : | CG.G.....T.TAG---.CA.TG..GGCAAAA.GG.A.CTCG.C..ATTCA..ACG..G.ACCT.G.TT.ATCTC.GAGCAAAGTAC...GCGA.T...GTA.C...T.GT.T.GCT.AA.A.-C..A.CAC.AGGT.C. | : | 138 |         |
| vtaA20 | : | CG.G.....T.TAG---.CA.TG..GGCAAAA.GG.A.CTCG.C..ATTCA..ACG..G.ACCT.G.TT.ATCTC.GAGCAAAGTAC...GCGA.T...GTA.C...T.GT.T.GCT.AA.A.-C..A.CAC.AGGT.C. | : | 138 |         |
| vtaA21 | : | CG.G.....T.TAG---.CA.T...GGCAAAA.GG.A.CTCG.C..ATTCA..ACG..G.ACCT.G.TT.ATCTC.GAGCAAAGTAC...GCGA.T...GTA.C...T.GT.T.GCT.AA.A.-C..A.CAC.AGGT.C. | : | 138 | GROUP 2 |
| vtaA22 | : | CG.G.....T.TA---.CA.TG..GGCAAAA.GG.A.CTCG.C..ATTCA..ACG..G.ACCT.G.TT.ATCTC.GAGCAAAGTAC...GCGA.T...GTA.C...T.GT.T.GCT.AA.A.-C..A.CAC.AGGT.C.  | : | 138 |         |
| vtaA23 | : | CG.G.....T.TA---.CA.CG..GGTACAA.GG.A.CTCG.C..ATTCA..ACG..G.ACCT.G.TT.ATCTC.GAGCAAAGTAC...GCGA.T...GTA.C...T.GT.T.GCT.AA.A.-C..A.CAC.AGGT.C.  | : | 138 |         |
| vtaA24 | : | CG.G.....T.TAG---.CA.TG..GGCAAAA.GG.A.CTCG.C..ATTCA..ACG..G.ACCT.G.TT.ATCTC.GAGCAAAGTAC...GCGA.T...GTA.C...T.GT.T.GCT.AA.A.-C..A.CAC.AGGT.C. | : | 138 |         |
| vtaA25 | : | CG.G.....T.TAG---.CA.T...GGC.AAA.GG.A.CTCG.C..ATTCA..ACG..G.ACCT.G.TT.ATCTC.GAGCAAAGTAC...GCGA.T...GTA.C...T.GT.T.GCT.AA.A.-C..A.CAC.AGGT.C. | : | 138 |         |
| vtaA26 | : | CG.G.....T.TAG---.CA.T...GGCAAAA.GG.A.CTCG.C..ATTCA..ACG..G.ACCT.G.TT.ATCTC.GAGCAAAGTAC...GCGA.T...GTA.C...T.GT.T.GCT.AA.A.-C..A.CAC.AGGT.C. | : | 138 |         |
| vtaA27 | : | CG.G.....T.TAG---.CA.TG..GGCAAAA.GG.A.CTCG.C..ATTCA..ACG..G.ACCT.G.TT.ATCTC.GAGCAAAGTAC...GCGA.T...GTA.C...T.GT.T.GCT.AA.A.-C..A.CAC.AGGT.C. | : | 138 |         |
| vtaA28 | : | CG.G.....T.TAG---.CA.T...GGCAAAA.GG.A.CTCG.C..ATTCA..ACG..G.ACCT.G.TT.ATCTC.GAGCAAAGTAC...GCGA.T...GTA.C...T.GT.T.GCT.AA.A.-C..A.CAC.AGGT.C. | : | 138 |         |
| YADAF2 | : | AGCTTAATAT-CTCAGCACAAAGGTGC>                                                                                                                 |   |     |         |

|        |   |                                                                                                                                              |   |     |         |
|--------|---|----------------------------------------------------------------------------------------------------------------------------------------------|---|-----|---------|
| vtaA12 | : | CGC.AACGGT.TGGTTTCC.T.GG.G.T.CA.GTG..GA.CGCC..AT.CA..ATG..G.A.CA.GG.A.AT.TC.TC.A..TCAAC...GCGA.T...GTA.C...T.GT.T-----AA.G.-.G.A-CAT.G.TT..G | : | 135 |         |
| vtaA13 | : | CG.G.....T.TAG---.CA.TG..GGCAAAA.GG.A.CTCG.C..ATTCA..ACG..G.ACCT.G.TT.ATCTC.GAGCAAAGTAC...GCGA.T...GTA.C...T.GT.T-----AA.G.-.G.A-CAT.G.TT..G | : | 132 | GROUP 3 |
| vtaA29 | : | CGC.AACGGT.TGGTTTCC.T.GG.G.T.CA.GTG..GA.CGCC..AT.CA..ATG..G.AGCA.GG.A.AT.TC.TC.A..TCAAC...GCGACT...GTA.C...T.GT.T-----AA.G.-.G.C-CAT.G.TT..G | : | 135 |         |
| vtaA30 | : | CG.G.....T.TAG---.CA.T...GGCAAAA.GG.A.CTCG.C..ATTCA..ACG..G.ACCT.G.TT.ATCTC.GAGCAAAGTAC...GCGA.T...GTA.C...T.GT.T-----AA.G.-.G.A-CAT.G.TT..G | : | 132 |         |
| YADAF3 | : | AATGGTAGCCAGTTGTAT-----AATGT-TGC>                                                                                                            |   |     |         |

|        | * | 160                                                                                                                                  | * | 180 | * | 200 | * | 220 | * | 240 | * | 260 | * | 280   |         |
|--------|---|--------------------------------------------------------------------------------------------------------------------------------------|---|-----|---|-----|---|-----|---|-----|---|-----|---|-------|---------|
| vtaA1  | : | TTAATCAATTATCAAGAGAT-ATTG-----TTAATGCAAGAGCGGGTATTGCTTCTGCTGGGCGATGGCTAATTTGCCACAAATTTCTTTACCAGGTAAAAGTGTATTTCTGTTTCTAATGCACAATATCGC |   |     |   |     |   |     |   |     |   |     |   | : 268 |         |
| vtaA2  | : | -----GTCGTGTTGATG-----TA-----T-----                                                                                                  |   |     |   |     |   |     |   |     |   |     |   | : 280 |         |
| vtaA3  | : | -----A-----                                                                                                                          |   |     |   |     |   |     |   |     |   |     |   | : 268 |         |
| vtaA4  | : | -----GTCGTGTTGATG-----T-----                                                                                                         |   |     |   |     |   |     |   |     |   |     |   | : 280 |         |
| vtaA5  | : | -----GTCGTGTTGATG-----G-----                                                                                                         |   |     |   |     |   |     |   |     |   |     |   | : 280 |         |
| vtaA6  | : | -----GTCGTGTTGATG-----                                                                                                               |   |     |   |     |   |     |   |     |   |     |   | : 280 |         |
| vtaA7  | : | -----GTCGTGTTGATG-----T-----                                                                                                         |   |     |   |     |   |     |   |     |   |     |   | : 280 | GROUP 1 |
| vtaA8  | : | -----GTCGTGTTGATG-----G-----                                                                                                         |   |     |   |     |   |     |   |     |   |     |   | : 280 |         |
| vtaA9  | : | -----GTCGTGTTGATG-----                                                                                                               |   |     |   |     |   |     |   |     |   |     |   | : 280 |         |
| vtaA14 | : | -----GTCGTGTTGATG-----G-----                                                                                                         |   |     |   |     |   |     |   |     |   |     |   | : 280 |         |
| vtaA15 | : | -----GTCGTGTTGATG-----                                                                                                               |   |     |   |     |   |     |   |     |   |     |   | : 280 |         |
| vtaA16 | : | -----GTCGTGTTGATG-----G-----                                                                                                         |   |     |   |     |   |     |   |     |   |     |   | : 280 |         |

|        |   |                                                                                                                                          |  |  |  |  |  |  |  |  |  |  |  |  |  |       |         |
|--------|---|------------------------------------------------------------------------------------------------------------------------------------------|--|--|--|--|--|--|--|--|--|--|--|--|--|-------|---------|
| vtaA10 | : | .A.GGG.G..AT...CA.T.AG..CAACCGTAATAATAAAGC.CTGC.T.....AGG.T..AAC..CGCA..AGG..A.....GG...A.C.C.....GTCAATG...G.A.CA..AGCG.GGACT.TCAAA     |  |  |  |  |  |  |  |  |  |  |  |  |  | : 280 |         |
| vtaA11 | : | .A.GGG.G..AT...CA.T.AG..CAACCGTAATAATAAAGC.CTGC.T.....AGG.T..AAC..CGCA..AGG..A.....GG...A.C.C.....GTCAATG...G.A.CA..AGCG.GGACT.TCAAA     |  |  |  |  |  |  |  |  |  |  |  |  |  | : 280 |         |
| vtaA17 | : | .A.GGG.G..AT...CA.T.AG..CAACCGTAATAATAAAGC.CTGC.T.....AGG.T..AAC..CGCA..AGG..A.....GG...A.A.C.T.....TCAATGG..G.G..A..AGCG.GGACT.TCAAA    |  |  |  |  |  |  |  |  |  |  |  |  |  | : 280 |         |
| vtaA18 | : | .A.GGG.G..AT...CA.T.AG..C.ACCGTAATAATAAAGC.CTGC.T.....AGG.T..AAC..CGCA..AGG..A.....GG...A.C.C.....GTCAATG...G.A.CA..AGCG.GGACT.TCAAA     |  |  |  |  |  |  |  |  |  |  |  |  |  | : 280 |         |
| vtaA19 | : | .A.GGG.G..AT...CA.T.AG..CAACCGTAATAATAAAGC.CTGC.T.....AGG.T..AAC..CGCA..AGG..A.....GG...A.C.C.....GTCAATG...G.A.CA..AGCG.GGACT.TCAAA     |  |  |  |  |  |  |  |  |  |  |  |  |  | : 280 |         |
| vtaA20 | : | .A.GGG.G..AT...CA.T.AG..CAACCGTAATAATAAAGC.CTGC.T.....AGG.T..AAC..CGCA..AGG..A.....GG...A.C.C.....GTCAATG...G.A.CA..AGCG.GGACT.TCAAA     |  |  |  |  |  |  |  |  |  |  |  |  |  | : 280 |         |
| vtaA21 | : | .A.GGG.G..AT...CA.T.AG..CAACCGTAATAATAAAGC.CTGC.T.....AGG.T..AAC..CGCA..AGG..A.....GG...A.A.C.T.....TCAATGG..G.G..A..AGCG.GGACT.TCAAA    |  |  |  |  |  |  |  |  |  |  |  |  |  | : 280 | GROUP 2 |
| vtaA22 | : | .A.GGG.G..AT...CA.T.AG..CAACCGTAATAATAAAGC.CTGC.T.....AGG.T..AAC..CGCA..AGG..A.....GG...A.C.C.....TCAATGG..G.G..A..AGCG.GGACT.TCAAA      |  |  |  |  |  |  |  |  |  |  |  |  |  | : 280 |         |
| vtaA23 | : | .A.GGG.G..AT...CA.T.AG..CAACCGTAATAATAAAGC.CTGC.T.....AGG.T..AAC..CGCA..AGG..A.....GG...A.C.C.....GTCAATG...G.A.CA..AGCG.GGACT.TCAAA     |  |  |  |  |  |  |  |  |  |  |  |  |  | : 280 |         |
| vtaA24 | : | .A.GGG.G..AT...CA.T.AG..CAACCGTAATAATAAAGC.CTGC.T.....AGG.T..AAC..CGCA..AGG..A.....GG...A.C.C.....GTCAATG...G.A.CA..AGCG.GGACT.TCAAA     |  |  |  |  |  |  |  |  |  |  |  |  |  | : 280 |         |
| vtaA25 | : | .A.GGG.G..AT...CA.T.AG..CAACCGTAATAATAAAGC.CTGC.T.....AGG.T..AAC..CGCA..AGG..A.....GG...A.A.C.T.....TCAATGG..G.G..A..AGCG.GGACT.TCAAA    |  |  |  |  |  |  |  |  |  |  |  |  |  | : 280 |         |
| vtaA26 | : | .A.GGG.G..AT...CA.T.AG..CAACCGTCAAAATAAAG.GCTTC.T..A.....AGG.T..AAC..CGCA..AGG..A.....GG...A.A.C.T.....TCAATGG..G.G..A..AGCG.GGACT.TCAAA |  |  |  |  |  |  |  |  |  |  |  |  |  | : 280 |         |
| vtaA27 | : | .A.GGG.G..AT...CA.T.AG..CAACCGTAATAATAAAGC.CTGC.T.....AGG.T..AAC..CGCA..AGG..A.....GG...A.A.C.T.....TCAATGG..G.G..A..AGCG.GGACT.TCAAA    |  |  |  |  |  |  |  |  |  |  |  |  |  | : 280 |         |
| vtaA28 | : | .A.GGG.G..AT...CA.T.AG..CAACCGTAATAATAAAGC.CTGC.T.....AGG.T..AAC..CGCA..AGG..A.....GG...A.C.C.T.....TCAATGG..G.G..A..AGCG.GGACT.TCAAA    |  |  |  |  |  |  |  |  |  |  |  |  |  | : 280 |         |

|        |   |                                                                                                                             |  |  |  |  |  |  |  |  |  |  |  |  |  |       |         |
|--------|---|-----------------------------------------------------------------------------------------------------------------------------|--|--|--|--|--|--|--|--|--|--|--|--|--|-------|---------|
| vtaA12 | : | ----G.G.AGT.AG....GA.--.GGCGTCAA-----CTTC.T.....G.AA.AAC...T...AGC...A.T.....G.GA.....CA.AT.GGG..C.GG..T..GTACT.TCGAG       |  |  |  |  |  |  |  |  |  |  |  |  |  | : 262 |         |
| vtaA13 | : | ----G.G.AGT.AG....GA.--.GGCGTCAA-----CTTC.T.....G.....G.AA.AAC...T...AGC...A.T.....G.GA.....CA.AT.GGG..C.GG..T..GTACT.TCGAG |  |  |  |  |  |  |  |  |  |  |  |  |  | : 259 | GROUP 3 |
| vtaA29 | : | ----G.G.AGT.AG....CGA.--.GTCGTCAA-----CTTC.T.....G.AA.AAC...T...AGC...A.T.....G.GA.....CA.AT.GGG..C.GG..T..GTACT.TCGAG      |  |  |  |  |  |  |  |  |  |  |  |  |  | : 262 |         |
| vtaA30 | : | ----G.G.AGT.AG....GA.--.GGCGTCAA-----CTTC.T.....G.AA.AAC...T...AGC...A.T.....G.GA.....CA.AT.GGG..C.GG..T..GTACT.TCGAG       |  |  |  |  |  |  |  |  |  |  |  |  |  | : 259 |         |

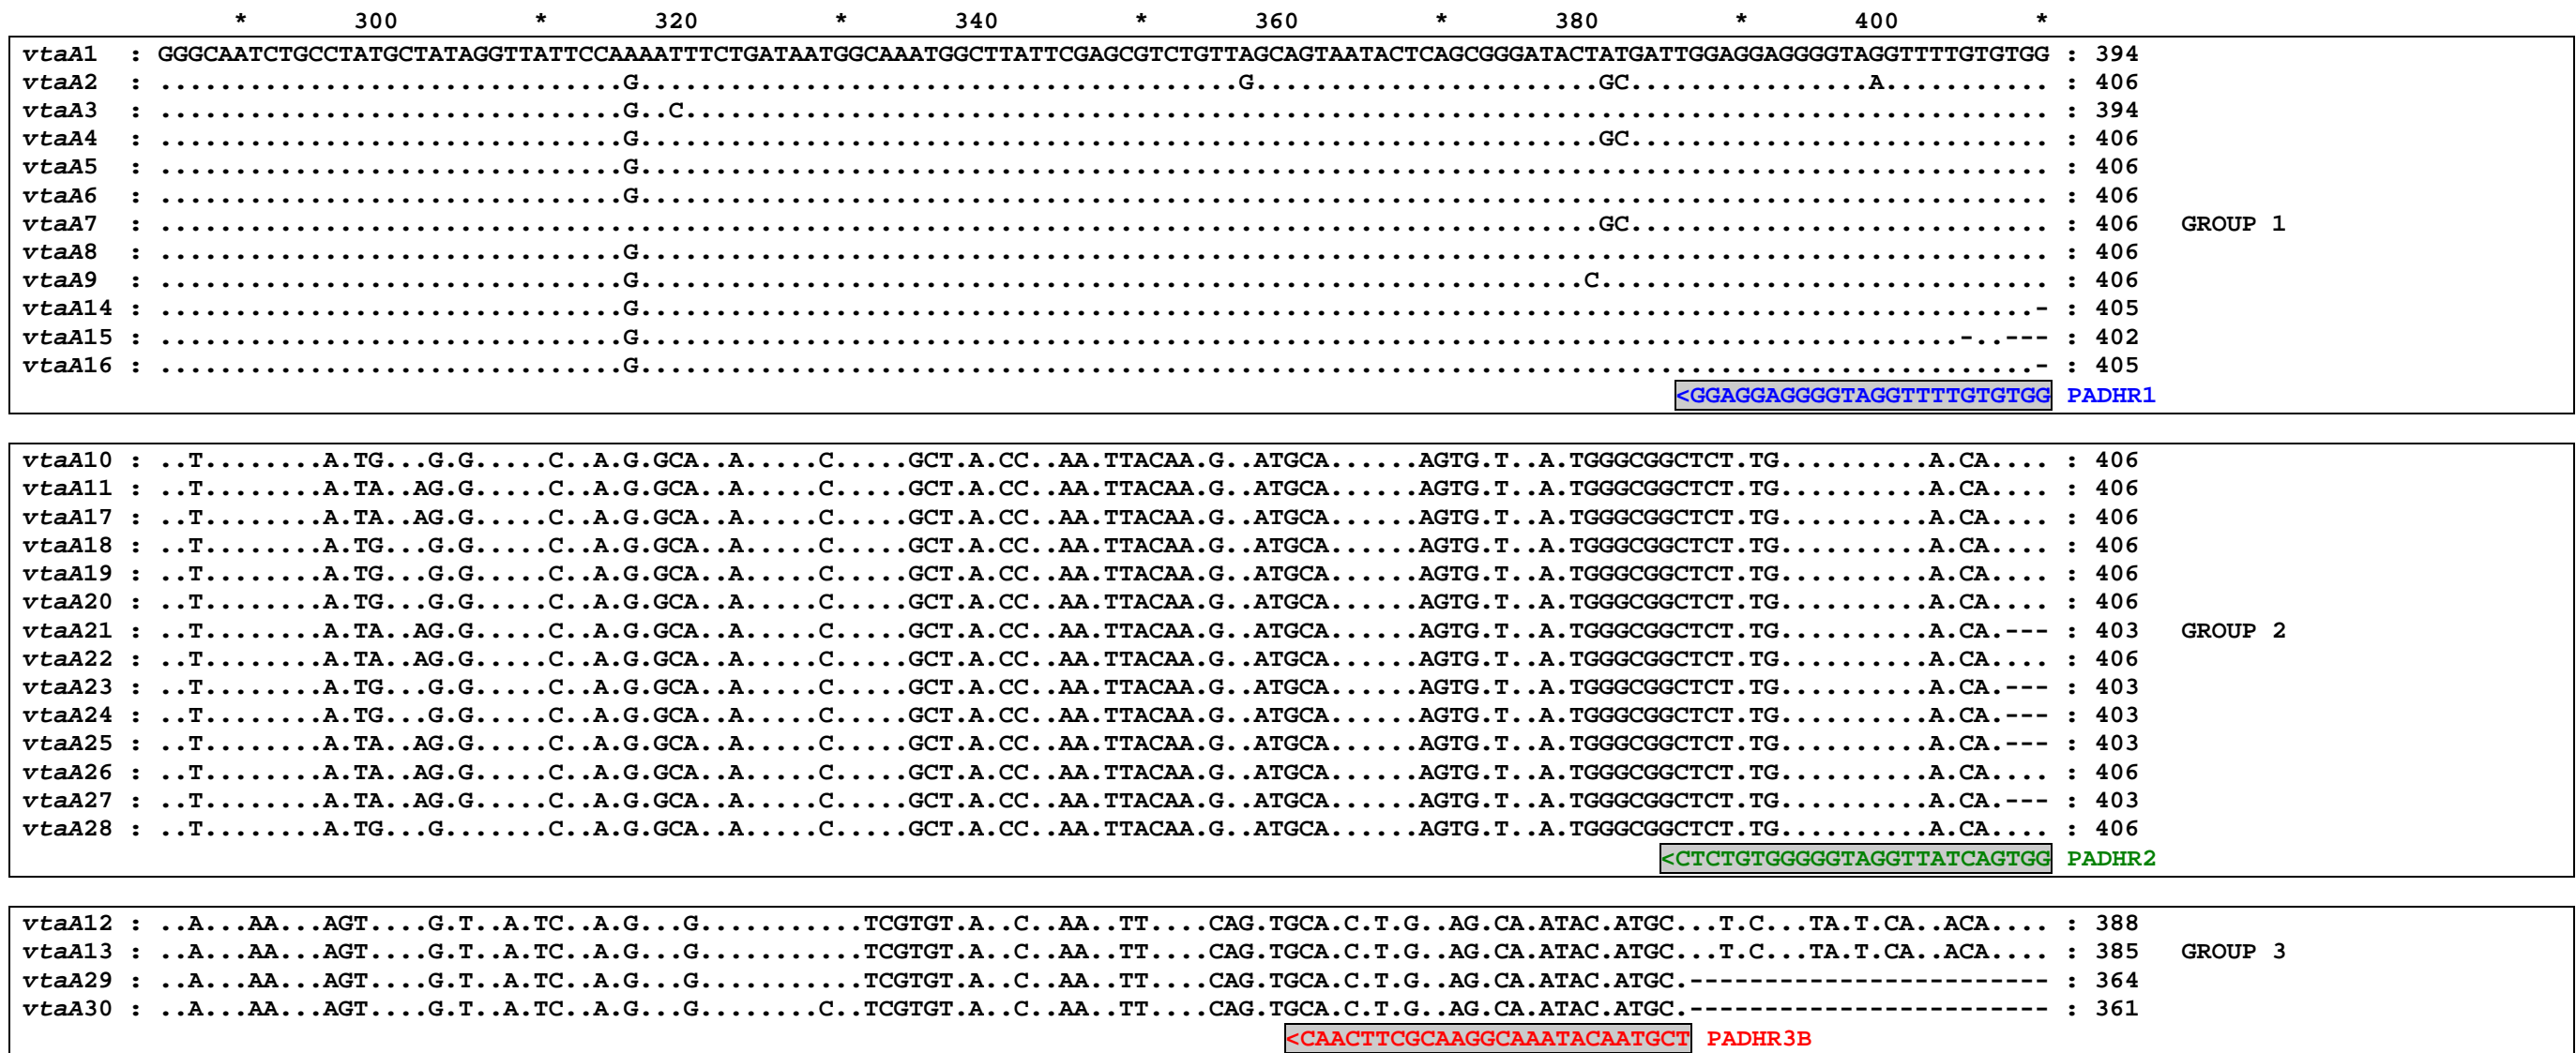

**FIGURE S1.** Multiple alignments of A) 5'-end (coding for the extended signal peptide) and B) 3'- end (coding for the translocator domains) of all *vtaA* genes sequenced. Primers used to amplify these genes are in shaded boxes at the bottom of the alignments.
